# Supplementary material for: Mesenchymal stem cells-derived exosomes are more immunosuppressive than microparticles in inflammatory arthritis
Source: PubMed Central journal article supplement — Theranostics. 2018 Feb 3;8(5):1399–410. doi: 10.7150/thno.21072 (PMC5835945; doi:10.7150/thno.21072), 2018-02-03

**Supl. Figure 1** MPs and Exos exert immunosuppressive function on T lymphocyte subsets. Representative images of CD8<sup>+</sup>IFN- $\gamma$ <sup>+</sup> cytotoxic T cells, CD4<sup>+</sup>IFN- $\gamma$ <sup>+</sup> Th1 cells, CD4<sup>+</sup>IL-10<sup>+</sup> Tr1 cells and CD4<sup>+</sup>CD25<sup>+</sup>Foxp3<sup>+</sup> Treg cells in splenocytes (n=4) when incubated alone (Ctrl) or with naïve MSCs (MSCs) or with 25 ng of Exos or MPs by flow cytometry analysis.

**Supl Figure 1**

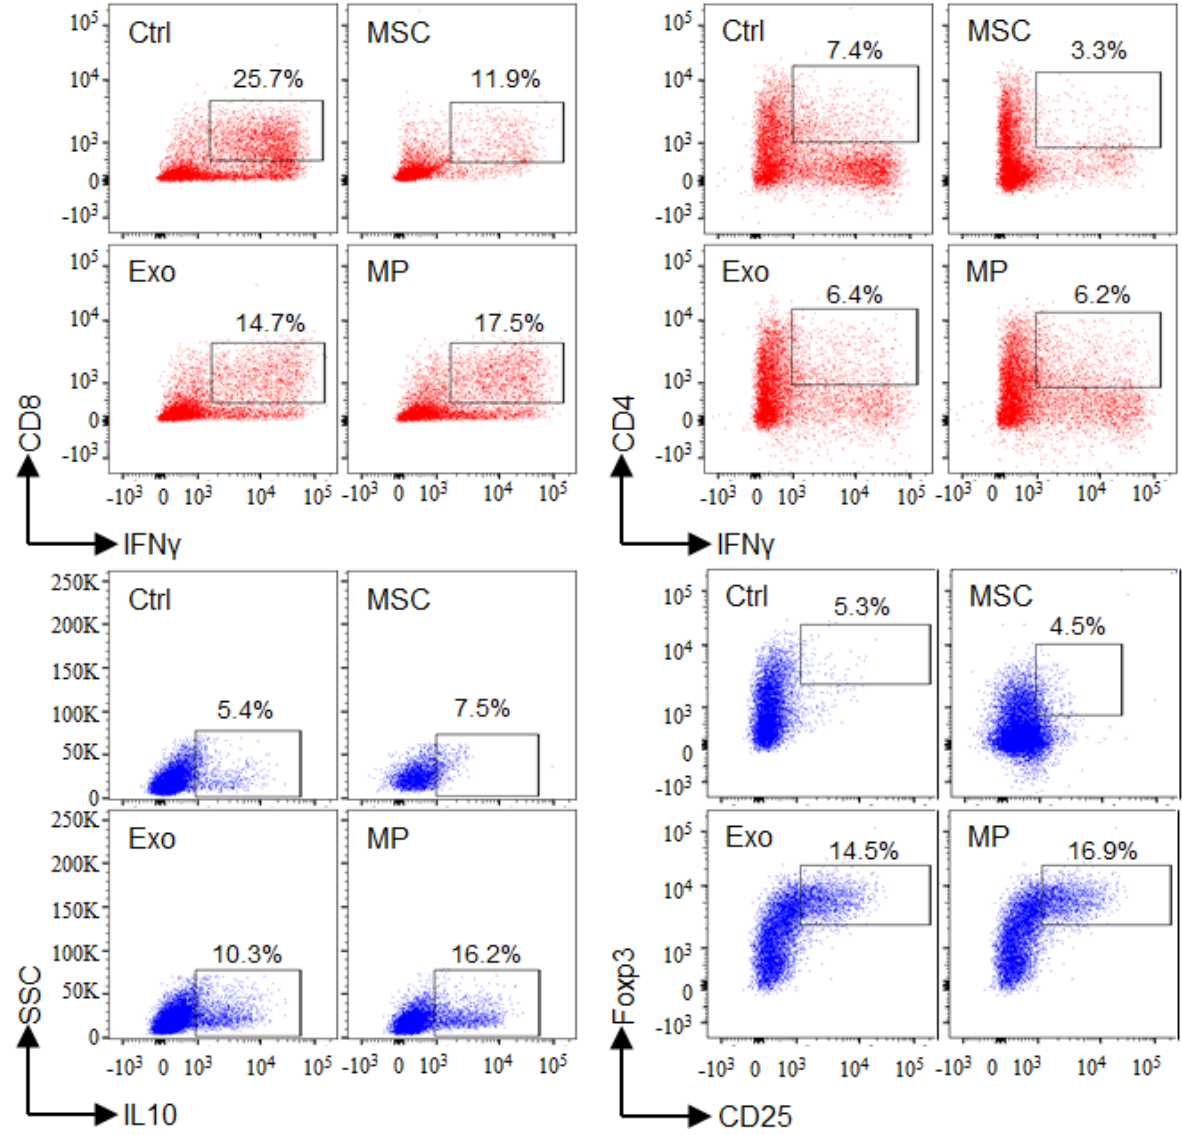

Supplement: thnov08p1399s1.pdf [file thnov08p1399s1.pdf]
